# Supplementary material for: Differential Evolutionary History in Visual and Olfactory Floral Cues of the Bee-Pollinated Genus Campanula (Campanulaceae)
Source: MDPI journal article supplement (doi:10.3390/plants10071356), 2021-07-02
Supplement: s1 [file s1]

**Table S3.** Loading of wavelengths (300-700nm) in the PCs of the colour phylogenetic PCA (pPCA).

| <b>Wavelengths<br/>(nm)</b> | <b>PC1</b>  | <b>PC13</b> |
|-----------------------------|-------------|-------------|
| 300                         | 0.01602165  | -0.04108138 |
| 310                         | 0.03684538  | -0.03774807 |
| 320                         | 0.02680381  | -0.03494278 |
| 330                         | 0.03917892  | -0.03044905 |
| 340                         | 0.00849212  | -0.03059024 |
| 350                         | -0.07573479 | -0.038159   |
| 360                         | -0.17550491 | -0.0641192  |
| 370                         | -0.22879529 | -0.10333623 |
| 380                         | -0.23254095 | -0.13340607 |
| 390                         | -0.23471548 | -0.13927886 |
| 400                         | -0.25778107 | -0.12214451 |
| 410                         | -0.26837313 | -0.0948444  |
| 420                         | -0.22585075 | -0.05030064 |
| 430                         | -0.14671571 | 0.00879697  |
| 440                         | -0.09936588 | 0.0555081   |
| 450                         | -0.07677404 | 0.09526556  |
| 460                         | -0.08561908 | 0.12893317  |
| 470                         | -0.09555745 | 0.15211905  |
| 480                         | -0.08980656 | 0.17295424  |
| 490                         | -0.06931516 | 0.19191662  |
| 500                         | -0.01076815 | 0.20793236  |
| 510                         | 0.04393317  | 0.21837056  |
| 520                         | 0.0880923   | 0.22632946  |
| 530                         | 0.12091998  | 0.23106475  |
| 540                         | 0.1392381   | 0.23160349  |
| 550                         | 0.14285279  | 0.23011262  |
| 560                         | 0.13054661  | 0.23005434  |
| 570                         | 0.10140139  | 0.22526127  |
| 580                         | 0.06370762  | 0.21797902  |
| 590                         | 0.02964108  | 0.21191512  |
| 600                         | -0.00152968 | 0.21225044  |
| 610                         | -0.0706967  | 0.21582672  |
| 620                         | -0.14277262 | 0.21736388  |
| 630                         | -0.2082134  | 0.21178748  |
| 640                         | -0.25324035 | 0.19327452  |
| 650                         | -0.2695239  | 0.16228114  |
| 660                         | -0.25200185 | 0.13241359  |
| 670                         | -0.24994098 | 0.09694677  |
| 680                         | -0.23398637 | 0.07859761  |
| 690                         | -0.18939181 | 0.08695029  |
| 700                         | -0.1526773  | 0.0941343   |
