# Supplementary material for: Differential Evolutionary History in Visual and Olfactory Floral Cues of the Bee-Pollinated Genus Campanula (Campanulaceae)
Source: MDPI journal article supplement (doi:10.3390/plants10071356), 2021-07-02
Supplement: s1 [file s1]

**Table S5.** Loading of compounds in the PCs of the scent phylogenetic PCA (pPCA).

| <b>Compounds</b>                      | <b>PC1</b>  | <b>PC10</b> |
|---------------------------------------|-------------|-------------|
| ( <i>E</i> )-2-Hexenal                | -0.0693656  | -0.08087125 |
| ( <i>E</i> )-2-Hexenol                | -0.07978117 | -0.09301444 |
| ( <i>Z</i> )-3-Hexenol                | -0.10202736 | -0.1189506  |
| ( <i>E</i> )-Epoxyocimene             | 0.04012247  | -0.05935527 |
| ( <i>E</i> )-Linalol oxide (furanoid) | -0.10980609 | -0.07411437 |
| ( <i>Z</i> )-Linalol oxide (furanoid) | -0.03928024 | -0.04579564 |
| ( <i>Z</i> )-Ocimenone                | 0.00171716  | -0.00474678 |
| ( <i>Z,E</i> )- $\alpha$ -Farnesene   | -0.0591046  | -0.0405051  |
| 1.6-Dioxaspiro [4.5] decane           | -0.0556249  | 0.08595418  |
| 1-Nitro-2-phenyl ethane               | -0.05679561 | 0.06817507  |
| 1-Phenylethanol                       | 0.07333081  | -0.01893703 |
| 2-Methyl-1.7-dioxaspiro(5.5)undecane  | -0.01035379 | -0.04752302 |
| 2-Nonanone                            | -0.01803162 | -0.08276361 |
| 2-Phenylethanol                       | 0.15531232  | -0.05567701 |
| 2-Phenylethyl acetate                 | 0.08797553  | -0.00692894 |
| 4-Ethylguaiaicol                      | 0.05001585  | -0.01291615 |
| 7-Ethyl-1.6-dioxaspiro(4.5)decane     | -0.06702593 | -0.0099324  |
| $\alpha$ - Calacorene                 | -0.00993617 | -0.0456062  |
| $\alpha$ -Cubebene                    | -0.05227661 | 0.05816533  |
| Allo-aromadendrene                    | -0.04603896 | 0.11216819  |
| Allo-ocimene                          | 0.03344949  | -0.07544967 |
| $\alpha$ -Longipinene                 | 0.04543027  | -0.04300755 |
| $\alpha$ -Caryophyllene               | 0.09055542  | 0.01830667  |
| $\alpha$ -Ylangene                    | 0.19210808  | 0.19210182  |
| Amorpha-4.11-diene                    | -0.01607924 | -0.07380235 |
| $\alpha$ -Phellandrene                | -0.05627377 | -0.06560788 |
| $\alpha$ -Pinene                      | 0.08167406  | 0.00455027  |
| Ar-Curcumene                          | 0.04724599  | -0.05990512 |
| Artemisiatriene                       | -0.0285928  | -0.03333547 |
| $\alpha$ -Selinene                    | -0.01431237 | -0.06569257 |
| $\alpha$ -Terpinene                   | -0.14966631 | 0.03402521  |
| $\alpha$ -Terpineol                   | 0.10246583  | -0.09875496 |
| $\beta$ -Bourbonene                   | 0.10289101  | 0.148995    |
| $\beta$ -Citronellol                  | -0.06706116 | -0.07818457 |
| B-Cubenene                            | -0.04221558 | 0.02060455  |
| B-Elemene                             | -0.0202326  | -0.09286594 |
| Phenylacetaldehyde                    | 0.10637166  | 0.06044502  |
| Benzeneacetonitrile                   | -0.02158913 | 0.09953997  |
| Benzyl acetate                        | 0.15021665  | 0.02336106  |
| Benzyl alcohol                        | 0.17131451  | -0.08090526 |
| $\beta$ -Sesquiphellandrene           | -0.0155423  | -0.07133785 |
| $\beta$ -Phellandrene                 | -0.05951797 | -0.0693902  |
| $\beta$ -Pinene                       | 0.05792306  | 0.00322704  |

|                                      |             |             |
|--------------------------------------|-------------|-------------|
| $\beta$ -Selinene                    | -0.01600848 | -0.07347759 |
| $\beta$ -Cedrene                     | 0.1708763   | 0.06340781  |
| $\beta$ -gurjunene                   | 0.0545946   | 0.02477274  |
| (Z)-3-Hexenyl acetate                | 0.16580425  | -0.29637022 |
| (Z)- $\gamma$ -Bisabolene            | -0.01550796 | -0.07118026 |
| (Z)- $\beta$ -Ocimene                | 0.01560755  | -0.21977801 |
| Citronellal                          | -0.04011469 | -0.0467685  |
| $\delta$ -3-Carene                   | -0.02539568 | 0.03028099  |
| $\delta$ -Cadinene                   | 0.03593022  | -0.0681997  |
| Dill ether                           | -0.04788272 | -0.06441345 |
| ( <i>E,E</i> )- $\alpha$ -Farnesene  | 0.01412175  | -0.05815205 |
| ( <i>E</i> )- $\beta$ -Caryophyllene | 0.18111922  | 0.03854019  |
| ( <i>E</i> )- $\beta$ -Farnesene     | 0.02729727  | -0.04953777 |
| Geranial                             | -0.09156277 | -0.10675025 |
| ( <i>E</i> )-Conophthorin            | -0.13479715 | 0.08138447  |
| Geraniol                             | -0.15526262 | -0.18101597 |
| ( <i>E</i> )-Isocitral               | -0.04689745 | -0.05467631 |
| Eucalyptol                           | -0.26060593 | 0.16087565  |
| $\gamma$ -Muurolene                  | 0.04712857  | 0.03779021  |
| $\gamma$ -Terpinene                  | -0.04938281 | -0.05757392 |
| Geranyl acetone                      | -0.11549011 | 0.05301376  |
| Germacrene D                         | 0.20071244  | -0.04710273 |
| Guaiacol                             | -0.01842531 | 0.01822362  |
| Hexyl acetate                        | 0.09406777  | -0.10272058 |
| Indole                               | 0.0356259   | 0.02483284  |
| 4-Oxoisophorone                      | -0.03118064 | 0.14396659  |
| Lavandulol                           | -0.07435631 | 0.00061655  |
| Lavandulyl acetate                   | -0.03046338 | 0.06334293  |
| Limonene                             | -0.09964932 | -0.11617811 |
| Linalool                             | -0.07353547 | -0.23753917 |
| Linalool oxide (pyranoid)            | -0.11400614 | -0.002368   |
| Longifolene                          | -0.00902698 | -0.04143308 |
| Methyl geranate                      | -0.03368174 | -0.03926852 |
| Methyl salicylate                    | 0.17435271  | -0.13007537 |
| Myrcene                              | 0.07418689  | -0.06922133 |
| Neo-allo-ocimene                     | 0.01642494  | -0.03901334 |
| Nerol oxide                          | -0.04091546 | -0.04770209 |
| Hexanol                              | -0.07505527 | -0.08750466 |
| <i>o</i> -Anisaldehyde               | -0.01207214 | 0.0093425   |
| <i>o</i> -Aminoacetophenone          | 0.0107055   | 0.03106285  |
| <i>p</i> -Anisaldehyde               | -0.06395019 | 0.0316811   |
| <i>p</i> -Cymene                     | -0.01381879 | -0.0634271  |
| <i>p</i> -Mentha-1.5-dien-8-ol       | 0.00191857  | -0.00530353 |
| <i>p</i> -Methylanisole              | -0.01172172 | 0.10368717  |
| Prezizaene                           | 0.1910022   | -0.04316733 |
| Sabinene                             | -0.01039333 | 0.01112665  |

|                                     |             |             |
|-------------------------------------|-------------|-------------|
| Sesquiterpene 1                     | -0.01234028 | 0.00955001  |
| Sesquiterpene 10                    | 0.06252413  | 0.00348338  |
| Sesquiterpene 11                    | -0.0620279  | -0.03161606 |
| Sesquiterpene 12                    | -0.00813133 | 0.02931106  |
| Sesquiterpene 13                    | 0.15536563  | 0.00576658  |
| Sesquiterpene 14                    | 0.1417541   | 0.0322957   |
| Sesquiterpene 15                    | -0.0091263  | 0.01434156  |
| Sesquiterpene 16                    | 0.09101384  | 0.04129826  |
| Sesquiterpene 17                    | 0.1062657   | -0.03626645 |
| Sesquiterpene 18                    | 0.18079055  | 0.03882454  |
| Sesquiterpene 19                    | 0.14329261  | 0.11814511  |
| Sesquiterpene 2                     | 0.05919195  | -0.01098428 |
| Sesquiterpene 20                    | 0.09646248  | -0.02491057 |
| Sesquiterpene 21                    | 0.15426822  | 0.08908532  |
| Sesquiterpene 22                    | 0.13830488  | 0.02568807  |
| Sesquiterpene 3                     | 0.00029971  | 0.06687707  |
| Sesquiterpene 4                     | -0.03686118 | 0.01807474  |
| Sesquiterpene 5                     | 0.00025954  | 0.05791256  |
| Sesquiterpene 6                     | -0.00546438 | -0.04129514 |
| Sesquiterpene 7                     | -0.06883642 | 0.02913674  |
| Sesquiterpene 8                     | -0.02282651 | 0.08903864  |
| Sesquiterpene 9                     | 0.04695501  | -0.0270496  |
| Terpinolene                         | -0.03981937 | -0.11058679 |
| ( <i>E</i> )- $\alpha$ -Bergamotene | -0.02045117 | -0.09386916 |
| ( <i>E</i> )- $\beta$ -Ocimene      | 0.159355    | -0.37219657 |
| Tridecane                           | -0.02495064 | -0.11452135 |
| Unknown 1                           | 0.00260978  | -0.00721425 |
| Unknown 10                          | -0.04529871 | -0.05281239 |
| Unknown 11                          | -0.00885463 | 0.0068525   |
| Unknown 12                          | -0.04954776 | 0.02592347  |
| Unknown 13                          | -0.08887038 | -0.0187659  |
| Unknown 14                          | -0.07451232 | -0.08687164 |
| Unknown 15                          | -0.05848675 | -0.06818792 |
| Unknown 16                          | 0.00450562  | -0.01245498 |
| Unknown 17                          | 0.00243234  | -0.00672376 |
| Unknown 18                          | 0.00215562  | -0.00595883 |
| Unknown 19                          | 0.00215591  | -0.00595962 |
| Unknown 2                           | 0.00227936  | -0.00630088 |
| Unknown 20                          | 0.00196753  | -0.00543887 |
| Unknown 21                          | -0.05069783 | 0.02755569  |
| Unknown 22                          | -0.00991323 | -0.05574573 |
| Unknown 23                          | -0.08547711 | 0.08312947  |
| Unknown 24                          | 0.00203798  | -0.00563361 |
| Unknown 25                          | 0.00216718  | -0.00599078 |
| Unknown 26                          | 0.06195385  | -0.01599903 |
| Unknown 3                           | -0.00800364 | -0.03673603 |

|                                       |             |             |
|---------------------------------------|-------------|-------------|
| Unknown 4                             | 0.00028884  | 0.06445159  |
| Unknown 5                             | 0.00043615  | 0.09732159  |
| Unknown 6                             | 0.00247619  | -0.00684498 |
| Unknown 7                             | 0.00196361  | -0.00542805 |
| Unknown 8                             | 0.00233631  | -0.0064583  |
| Unknown 9                             | 0.05092649  | -0.00519274 |
| Verbenone                             | -0.00792953 | -0.03639589 |
| Ylanga-2.4( 15)-diene                 | 0.00021852  | 0.04876039  |
| (Z)-7-Ethyl-1.6-dioxaspiro(4.5)decane | -0.00904203 | -0.04150216 |
| Neral                                 | -0.08729771 | -0.10177775 |
| (Z)-Conophthorin                      | -0.07747901 | 0.1136441   |
| Nerol                                 | -0.15638515 | -0.18232469 |
| (Z)-Isocitral                         | -0.03919337 | -0.04569435 |
| $\alpha$ -Copaene                     | -0.05452854 | 0.1459617   |
| $\alpha$ -Muurolene                   | -0.10699342 | 0.00786171  |

---
