# Supplementary material for: Differential Evolutionary History in Visual and Olfactory Floral Cues of the Bee-Pollinated Genus Campanula (Campanulaceae)
Source: MDPI journal article supplement (doi:10.3390/plants10071356), 2021-07-02
Supplement: s1 [file s1]

**Table S1.** Euclidean distances (in hexagon units) among flower colour loci of *Campanula* species (values  $\leq 0.1$  units are in bold). Distances to the hexagon centre (CEN) are also given. Abbreviations of species name are as follows: *C. glomerata* (GLO), *C. lactiflora* (LAC), *C. latifolia* (LAT), *C. medium* (MED), *C. moravica* (MOR), *C. patula* (PAT), *C. persicifolia* (PER), *C. punctata* (PUN), *C. rapunculoides* (RPC), *C. rapunculus* (RAP), *C. rotundifolia* (ROT), *C. scheuchzeri* (SCH), *C. thyrsoides* (THY) and *C. trachelium* (TRA).

|     | GLO         | LAT         | LAC         | MED         | MOR         | PAT         | PER         | PUN         | RPC         | RAP  | ROT         | SCH  | THY  | TRA | CEN  |
|-----|-------------|-------------|-------------|-------------|-------------|-------------|-------------|-------------|-------------|------|-------------|------|------|-----|------|
| GLO |             |             |             |             |             |             |             |             |             |      |             |      |      |     | 0.25 |
| LAT | <b>0.04</b> |             |             |             |             |             |             |             |             |      |             |      |      |     | 0.22 |
| LAC | 0.33        | 0.29        |             |             |             |             |             |             |             |      |             |      |      |     | 0.20 |
| MED | <b>0.10</b> | <b>0.08</b> | 0.31        |             |             |             |             |             |             |      |             |      |      |     | 0.29 |
| MOR | 0.16        | 0.11        | 0.17        | 0.15        |             |             |             |             |             |      |             |      |      |     | 0.17 |
| PAT | <b>0.09</b> | <b>0.06</b> | 0.23        | 0.12        | <b>0.07</b> |             |             |             |             |      |             |      |      |     | 0.17 |
| PER | 0.21        | 0.17        | 0.14        | 0.17        | <b>0.06</b> | 0.13        |             |             |             |      |             |      |      |     | 0.21 |
| PUN | 0.23        | 0.19        | <b>0.09</b> | 0.22        | <b>0.08</b> | 0.14        | <b>0.07</b> |             |             |      |             |      |      |     | 0.15 |
| RPC | <b>0.07</b> | <b>0.05</b> | 0.30        | <b>0.03</b> | 0.13        | <b>0.09</b> | 0.17        | 0.21        |             |      |             |      |      |     | 0.26 |
| RAP | <b>0.08</b> | <b>0.05</b> | 0.26        | 0.13        | 0.10        | <b>0.04</b> | 0.16        | 0.17        | 0.10        |      |             |      |      |     | 0.17 |
| ROT | 0.23        | 0.19        | 0.12        | 0.20        | <b>0.08</b> | 0.15        | <b>0.02</b> | <b>0.06</b> | 0.19        | 0.18 |             |      |      |     | 0.21 |
| SCH | <b>0.09</b> | <b>0.07</b> | 0.28        | <b>0.03</b> | 0.12        | <b>0.09</b> | 0.14        | 0.19        | <b>0.03</b> | 0.12 | 0.17        |      |      |     | 0.27 |
| THY | 0.52        | 0.48        | 0.20        | 0.51        | 0.37        | 0.42        | 0.33        | 0.29        | 0.49        | 0.45 | 0.31        | 0.47 |      |     | 0.33 |
| TRA | 0.17        | 0.13        | 0.17        | 0.14        | <b>0.04</b> | <b>0.09</b> | <b>0.04</b> | <b>0.09</b> | 0.12        | 0.13 | <b>0.06</b> | 0.11 | 0.37 |     | 0.20 |
