# Supplementary material for: Differential Evolutionary History in Visual and Olfactory Floral Cues of the Bee-Pollinated Genus Campanula (Campanulaceae)
Source: MDPI journal article supplement (doi:10.3390/plants10071356), 2021-07-02
Supplement: s1 [file s1]

**Table S4.** Scores of each *Campanula* species in the PCs of the colour phylogenetic PCA (pPCA).

| Species                        | PC1         | PC13        |
|--------------------------------|-------------|-------------|
| <i>Campanula glomerata</i>     | -0.49809872 | -0.09793997 |
| <i>Campanula lactiflora</i>    | -0.03454469 | 0.4489037   |
| <i>Campanula latifolia</i>     | -0.12967818 | -0.17235813 |
| <i>Campanula medium</i>        | 0.13030799  | -0.44736924 |
| <i>Campanula moravica</i>      | 0.1722332   | -0.12551131 |
| <i>Campanula patula</i>        | -0.32396733 | 0.1138514   |
| <i>Campanula persicifolia</i>  | 0.06197114  | -0.11683345 |
| <i>Campanula punctata</i>      | 0.04484866  | 0.14290352  |
| <i>Campanula rapunculoides</i> | 0.34257116  | -0.49155058 |
| <i>Campanula rapunculus</i>    | -0.26456216 | 0.11840947  |
| <i>Campanula rotundifolia</i>  | 0.26909938  | -0.25334226 |
| <i>Campanula scheuchzeri</i>   | 0.16937767  | -0.38657881 |
| <i>Campanula thyrsooides</i>   | 0.0739994   | 1.42260855  |
| <i>Campanula trachelium</i>    | -0.01355753 | -0.15519292 |
