# Supplementary material for: Differential Evolutionary History in Visual and Olfactory Floral Cues of the Bee-Pollinated Genus Campanula (Campanulaceae)
Source: MDPI journal article supplement (doi:10.3390/plants10071356), 2021-07-02
Supplement: s1 [file s1]

**Table S6.** Scores of *Campanula* species in the PCs of the scent Phylogenetic PCA (pPCA).

| Species                        | PC1         | PC10        |
|--------------------------------|-------------|-------------|
| <i>Campanula glomerata</i>     | -0.11390973 | 1.18967664  |
| <i>Campanula lactiflora</i>    | 0.01667072  | -1.76237417 |
| <i>Campanula latifolia</i>     | -0.31426454 | 2.72387947  |
| <i>Campanula medium</i>        | -2.67116754 | 2.44111151  |
| <i>Campanula persicifolia</i>  | 1.50436125  | -0.55309364 |
| <i>Campanula punctata</i>      | -0.28099431 | -0.22567728 |
| <i>Campanula rapunculoides</i> | -1.10362469 | 1.56383615  |
| <i>Campanula rapunculus</i>    | 2.77874624  | 1.27164327  |
| <i>Campanula rotundifolia</i>  | 2.48403147  | -0.68151923 |
| <i>Campanula thyrsoides</i>    | -2.7362542  | -3.28800931 |
| <i>Campanula trachelium</i>    | 0.43640534  | -2.6794734  |
